# Supplementary material for: Quantum mechanics of molecular oxygen clusters: rotovibrational dimer dynamics from realistic potential energy surfaces
Source: Royal Society of Chemistry journal article supplement (doi:10.1039/b203772f), 2002-01-01
Supplement: table_s1.pdf [file table_s1.pdf]

**Table S1** Energy (in  $cm^{-1}$ ) in the first rovibrational levels ( $J \leq 6$ ,  $K=0,1,2$  and symmetry  $A_1$ ) for the  $O_2-O_2$  dimer in the triplet electronic state, calculated using the *helicity decoupling* approximation. The rotational constants are also reported.

| $K$ | $J = 0$   | $J = 1$   | $J = 2$   | $J = 3$   | $J = 4$   | $J = 5$   | $J = 6$   | rotational constant |
|-----|-----------|-----------|-----------|-----------|-----------|-----------|-----------|---------------------|
| 0   | -106.0909 | -96.39785 | -105.6191 | -95.63617 | -104.5189 | -94.26602 | -102.7912 | 0.07761             |
|     | -84.88723 | -82.34845 | -84.43394 | -81.60071 | -83.37688 | -80.25564 | -81.71747 | 0.07520             |
|     | -77.72331 | -76.23861 | -77.27374 | -75.48096 | -76.22536 | -74.11868 | -74.57965 | 0.07521             |
|     | -76.22141 | -73.12978 | -75.78454 | -72.38592 | -74.76564 | -71.04732 | -73.16581 | 0.07451             |
|     | -71.50700 | -63.55335 | -71.05617 | -62.83022 | -70.00486 | -61.52971 | -68.35461 | 0.07396             |
| 1   |           | -103.4078 | -89.09196 | -102.6233 | -88.05023 | -101.2122 | -86.41521 | 0.07639             |
|     |           | -82.94458 | -83.73310 | -82.21349 | -82.67817 | -80.89845 | -81.02141 | 0.07421             |
|     |           | -75.79890 | -70.59769 | -75.05621 | -69.58593 | -73.72029 | -67.99722 | 0.07450             |
|     |           | -70.49581 | -68.25356 | -69.76697 | -67.21145 | -68.45626 | -65.57559 | 0.07362             |
|     |           | -67.42497 | -61.02357 | -66.68484 | -60.04378 | -65.35351 | -58.50611 | 0.07196             |
| 2   |           |           | -102.8924 | -86.40529 | -101.7956 | -85.01624 | -100.0734 | 0.07793             |
|     |           |           | -86.50651 | -79.25316 | -85.43556 | -77.91600 | -83.75388 | 0.07574             |
|     |           |           | -80.10160 | -68.10658 | -79.04841 | -66.77943 | -77.39491 | 0.07471             |
|     |           |           | -72.41278 | -61.52950 | -71.38058 | -60.21660 | -69.76017 | 0.07344             |
|     |           |           | -65.33296 | -56.36607 | -64.30834 | -55.05999 | -62.69971 | 0.07296             |
