# Supplementary material for: Quantum mechanics of molecular oxygen clusters: rotovibrational dimer dynamics from realistic potential energy surfaces
Source: Royal Society of Chemistry journal article supplement (doi:10.1039/b203772f), 2002-01-01
Supplement: table_s4.pdf [file table_s4.pdf]

**Table S4** Energy (in  $\text{cm}^{-1}$ ) of the dimer in the lowest rotovibrational states of  $A_2^-$  (top) and  $A_1^+$  (bottom) symmetry and with  $J \leq 6$  (for the quintet electronic state)

| J = 0     | J = 1     | J = 2     | J = 3     | J = 4     | J = 5     | J = 6     |
|-----------|-----------|-----------|-----------|-----------|-----------|-----------|
| -65.82112 | -90.19567 | -91.48161 | -89.69298 | -90.46884 | -88.60962 | -88.87841 |
| -42.18787 | -89.78861 | -79.59088 | -88.82069 | -78.82778 | -87.25882 | -77.53446 |
| -33.05820 | -71.68308 | -78.68974 | -81.56828 | -78.64125 | -80.33903 | -77.07452 |
| -29.95727 | -68.77956 | -72.09297 | -77.40793 | -77.51203 | -76.23458 | -75.75697 |
| -18.70908 | -66.93307 | -68.55764 | -71.00956 | -71.27201 | -76.08057 | -69.80310 |
| -15.82496 | -64.02603 | -65.36692 | -68.42681 | -71.16578 | -69.79721 | -69.59111 |
| -10.11401 | -58.57609 | -62.87372 | -67.03981 | -67.59897 | -67.64089 | -66.09180 |
| -4.452259 | -57.02298 | -60.61236 | -65.79830 | -64.31078 | -66.78065 | -63.93053 |
| -2.742346 | -56.20663 | -57.31395 | -65.20235 | -62.23294 | -65.84184 | -62.66132 |
|           | -53.85194 | -55.27063 | -63.39613 | -61.59788 | -64.12868 | -60.93225 |
| -93.17298 | -89.89037 | -92.74479 | -89.18398 | -91.74760 | -87.91334 | -90.18625 |
| -73.59487 | -71.71312 | -91.48151 | -81.56826 | -90.46640 | -80.33902 | -88.86730 |
| -66.10246 | -68.96258 | -79.59015 | -77.40807 | -78.82076 | -76.23508 | -77.51219 |
| -63.39282 | -67.01941 | -78.68789 | -71.17911 | -78.64127 | -76.08103 | -77.07446 |
| -56.94524 | -58.58501 | -73.16957 | -68.12322 | -77.51104 | -70.18325 | -75.76445 |
| -51.16815 | -56.21378 | -72.04026 | -67.14511 | -72.17821 | -66.78062 | -70.62343 |
| -47.72935 | -53.86791 | -68.55764 | -66.14887 | -71.26047 | -66.65014 | -69.67207 |
| -42.49871 | -48.94313 | -65.73118 | -65.20386 | -71.00433 | -66.13081 | -69.36752 |
| -41.95687 | -48.30327 | -63.06749 | -58.69325 | -67.59860 | -64.75670 | -66.08992 |
| -38.65456 | -43.57964 | -62.86572 | -57.91557 | -64.86401 | -63.77575 | -63.93057 |
